# Supplementary material for: View-sharing for 4D magnetic resonance imaging with randomized projection-encoding enables improvements of respiratory motion imaging for treatment planning in abdominothoracic radiotherapy
Source: PubMed Central journal article supplement — Phys Imaging Radiat Oncol. 2023 Jan 2;25:100409. doi: 10.1016/j.phro.2022.12.006 (PMC9841273; doi:10.1016/j.phro.2022.12.006), 2023-01-02
Supplement: mmc1.pdf [file mmc1.pdf]

1           **Supplementary Materials S1: MR signal simulation**

2           The 4D-XCAT phantom was used to simulate the abdominothoracic anatomy of the adult  
3 male with the following parameters: 2.5 mm isotropic voxel size, heart rate of 80 BPM, 3.0 cm  
4 maximum diaphragm motion, 1.0 cm maximum body surface expansion, and breathing period of  
5 5.0 sec. Phantom volumes were generated at the temporal sampling rate of 5.0 msec. A spherical  
6 lesion with a 2.0 cm diameter was added in the right middle lobe. Lesion motion was simulated  
7 with a displacement of 2.0 cm in the SI direction, 1.0 cm in the AP direction, and no lateral  
8 displacement, as shown in Figure S1.

9           The raw MR signal was simulated by sampling the Fourier transform of the XCAT  
10 phantom along the points defined by the radial trajectories described in the manuscript. For the  
11 stack-of-stars trajectory, 650 spokes/stack were used. For the multidimensional golden means  
12 trajectory, at total of 26000 spokes were used. The discrete Fourier transform was calculated  
13 analytically.

14           Reconstruction time is primarily driven by the number of spokes and matrix size (i.e. the  
15 number of sample points per spoke). In a quad-core workstation with 16 GB of RAM, we find  
16 that the most limiting step is the calculation of the density compensation factors. This step takes  
17 ~1.5 minutes per breathing phase. However, density compensation factors can be pre-computed  
18 for a given sampling function. The time for re-gridding and inverse Fourier transform is ~0.3  
19 minutes per breathing phase.

## View-sharing for respiratory motion imaging

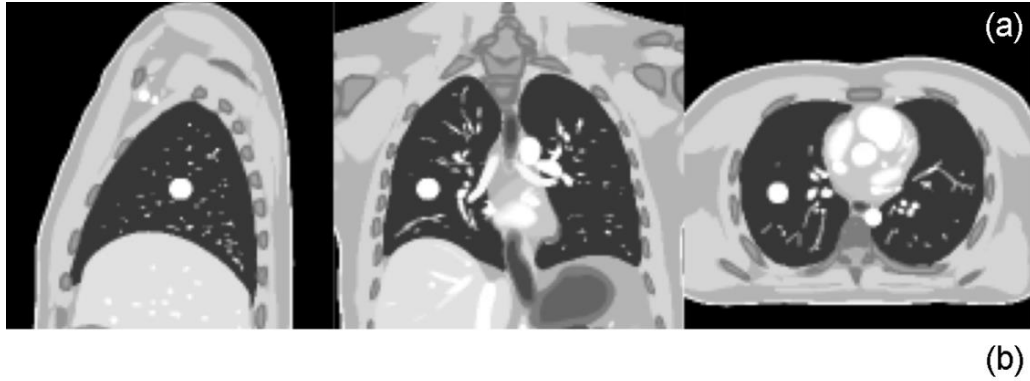

20

21 **Supplementary Figure S1.** (a) Orthogonal slices in the XCAT digital phantom. The 4D-XCAT phantom was used  
22 to simulate the abdominothoracic anatomy of the adult male with the following parameters: 2.5 mm isotropic voxel  
23 size, heart rate of 80 BPM, 3.0 cm maximum diaphragm motion, 1.0 cm maximum body surface expansion, and  
24 breathing period of 5.0 sec. Phantom volumes were generated at the temporal sampling rate of 5.0 msec. (b) A  
25 spherical lesion with a 2.0 cm diameter was added in the right middle lobe. Lesion motion was simulated with a  
26 displacement of 2.0 cm in the SI direction, 1.0 cm in the AP direction, and no lateral displacement. This trajectory is  
27 chosen to include motion hysteresis.

28

29

30

31

32

View-sharing for respiratory motion imaging

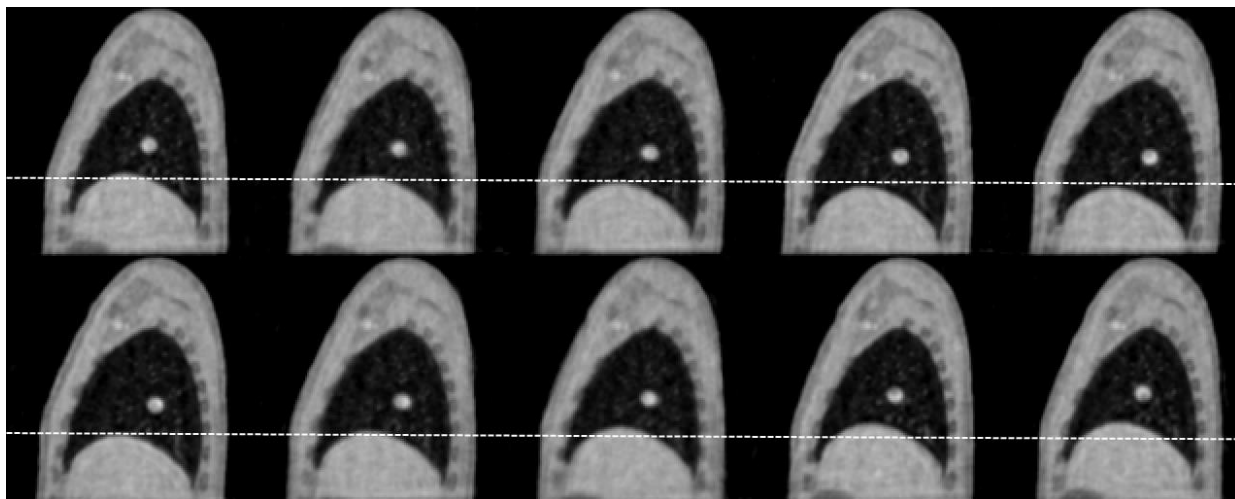

33

34 **Supplementary Figure S2.** Montage of sagittal slices from respiratory phases 1-10 (top row: phases 1-5; bottom  
35 row: phases 6-10) reconstructed using RSGR-PEVS.

36

37

38

## View-sharing for respiratory motion imaging

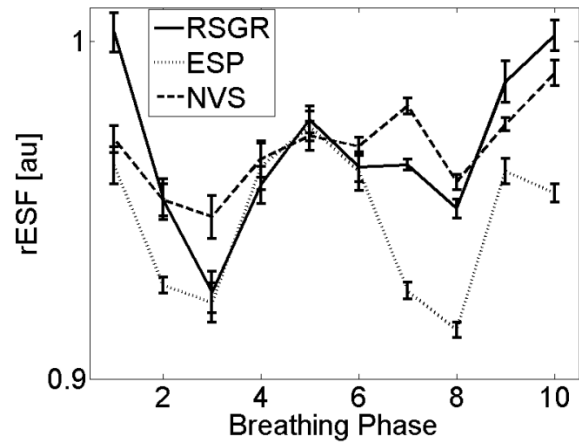

39

40 **Supplementary Figure S3.** Improvements in spatial resolution are respiratory phase dependent. rESF at lung-liver  
41 interface as a function of breathing phase for the multidimensional golden means trajectory and the three view-  
42 sharing reconstruction techniques described in manuscript.

43

## View-sharing for respiratory motion imaging

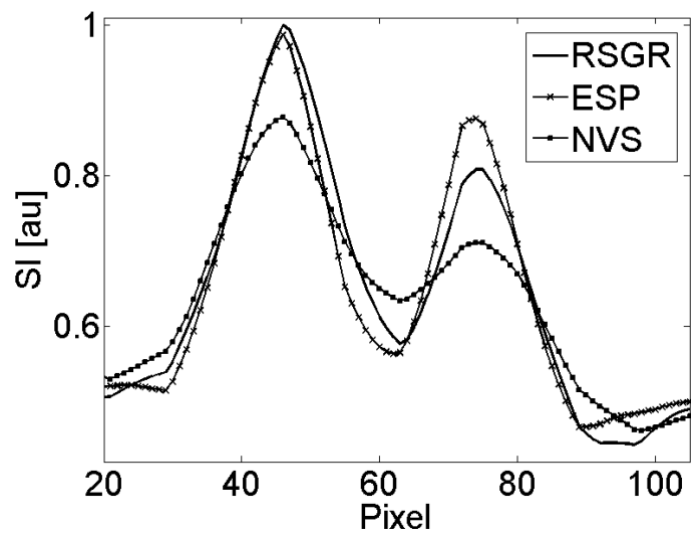

44

45 **Supplementary Figure S4.** Line profiles through pulmonary vessels demonstrating improvements in spatial  
46 resolution. The effect of view-sharing is shown for the multidimensional golden means trajectory.

## View-sharing for respiratory motion imaging

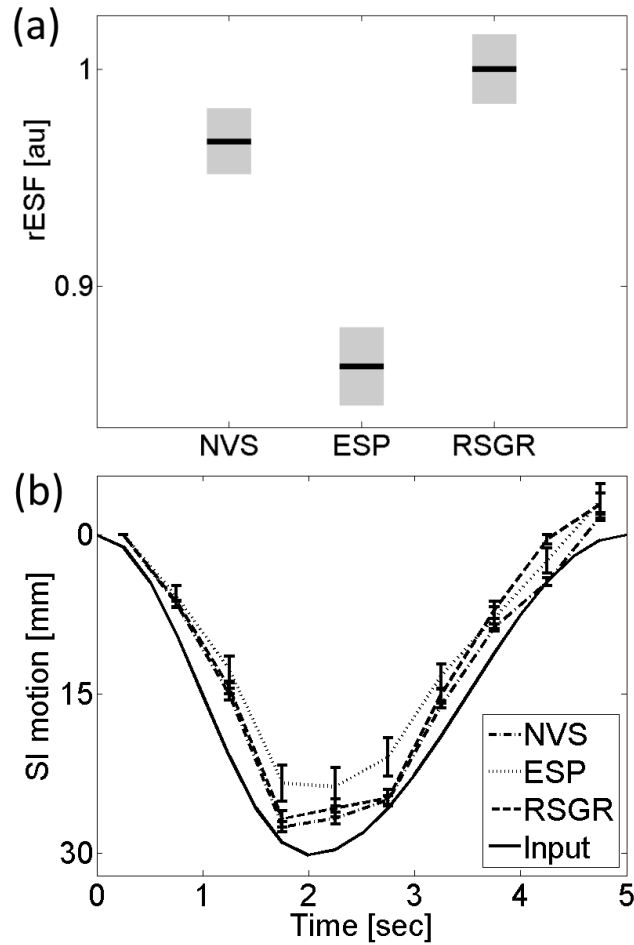

47

48 **Supplementary Figure S5.** Comparison of the effect of view-sharing reconstruction techniques in regions with  
49 large temporal changes. (a) Mean rESF across breathing phases as a function of reconstruction technique. In regions  
50 with large temporal changes, RSGR-PEVS provides a significant improvement in spatial resolution while ESP-  
51 PEVS degrades spatial resolution. Bar-plots depict average  $\pm$  standard error of mean. (b) Displacement of lung-liver  
52 interface determined from ten line profiles at the region highlighted in panel (a). The effect of view-sharing is shown  
53 for the multidimensional golden means trajectory.

54

View-sharing for respiratory motion imaging

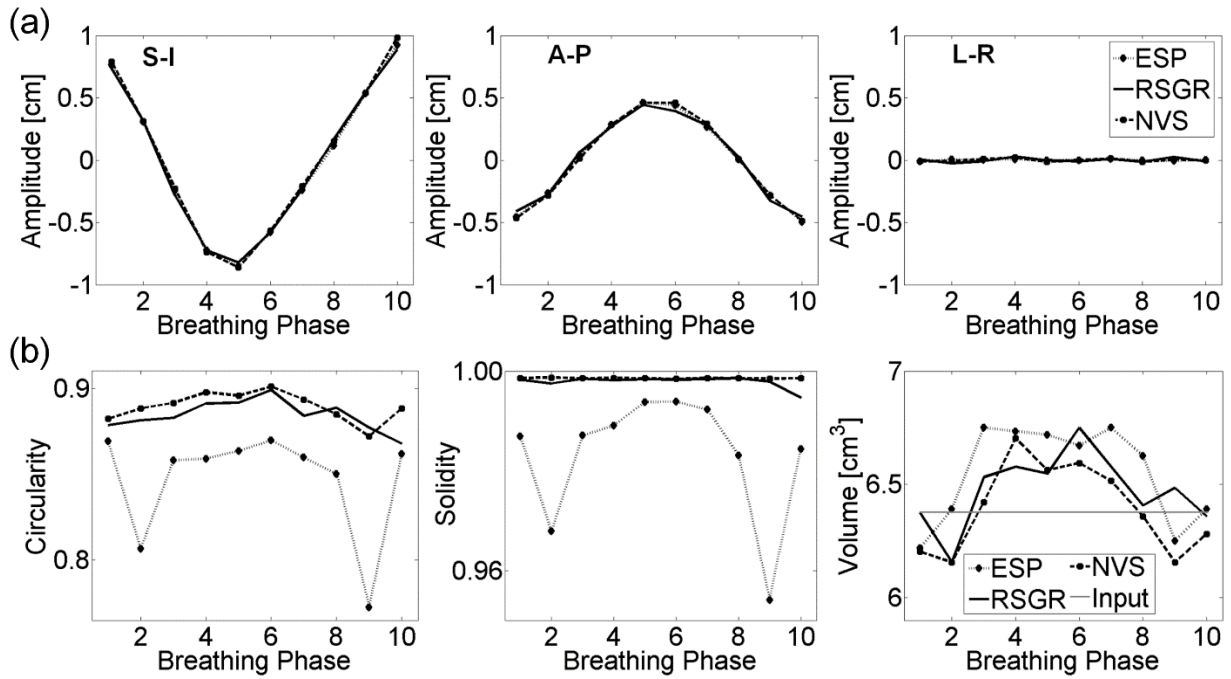

55

56 **Supplementary Figure S6.** Characterization of lesion detection as a function of reconstruction method. (a)  
 57 Displacement of lesion center-of-mass in (left) superior-inferior (center) anterior-posterior and (right) left-right  
 58 direction. (b) Shape metrics as a function of respiratory phase: (left) circularity, (center) solidity, and (right) volume  
 59 of lesion. The effect of view-sharing is shown for the multidimensional golden means trajectory.

60

61 **Supplementary Materials S2: Imaging parameters for dynamic phantom**

62 The dynamic phantom was imaged in a 7T MR scanner (Bruker BioSpin MRI GmbH,  
63 Ettlingen, Germany). An actively detuned volume RF-coil was used in conjunction with a four-  
64 channel coil for surface receive. The pulse sequence and acquisition parameters were: gradient-  
65 echo, FOV = 30x30x30 mm<sup>3</sup>, matrix = 128<sup>3</sup>, TR/TE = 5.0/0.02 ms, BW = 100 kHz, NEX = 1,  $\alpha$   
66 = 10°, 25200 spokes, and total scan time = 2.1 mins. The respiratory signal was extracted from  
67 the center of k-space.

68 The dynamic phantom was also imaged with Cartesian cine-MRI using the following  
69 parameters: FLASH pulse sequence, FOV = 30 mm<sup>3</sup>, matrix = 90 x 90, 10 dummy views, single  
70 slice imaging, slice thickness = 1 mm, TR/TE = 3.0/1.8 ms, BW = 100 kHz, NEX = 1,  $\alpha$  = 10°,  
71 and frame rate ~ 3 fps.

72 The phantom was connected to a linear actuator (Dynamic Phantom, CIRC, Norfolk, VA)  
73 able to generate a user-selected trajectory. A sinusoidal motion trajectory with a 2.5 mm  
74 amplitude (5.0 mm displacement) and a period of 5 seconds guided the displacement of the 2  
75 mm tube. Motion direction was along the longitudinal axis of the large tube. This configuration  
76 simulates a small moving target of known dimensions (2 mm tube) next to a stable and stationary  
77 structure (15 mm tube).

78 We include three movies in order to clarify the motion of the dynamic phantom. The file  
79 named **DynPhantom\_2D\_FLASH.avi** shows the acquisition with 2D FLASH. The file named  
80 **DynPhantom\_RSGR-PEVS.avi** is a movie of the surface rendered RSGR-PEVS acquisition  
81 while **DynPhantom\_Sagittal\_RSGR-PEVS.avi** shows a movie of the sagittal slice shown in  
82 Fig. S7 below.

83 Figure S7 demonstrates improvements in image quality in the dynamic phantom. The  
84 effects of reconstruction on resolution and detection are analyzed in an approach analogous to  
85 the one used in the digital XCAT phantom. Panel S7(c) compares the location of the center-of-  
86 mass of the 2 mm dynamic phantom. The three 4D-PEVS methods can determine the location



## View-sharing for respiratory motion imaging

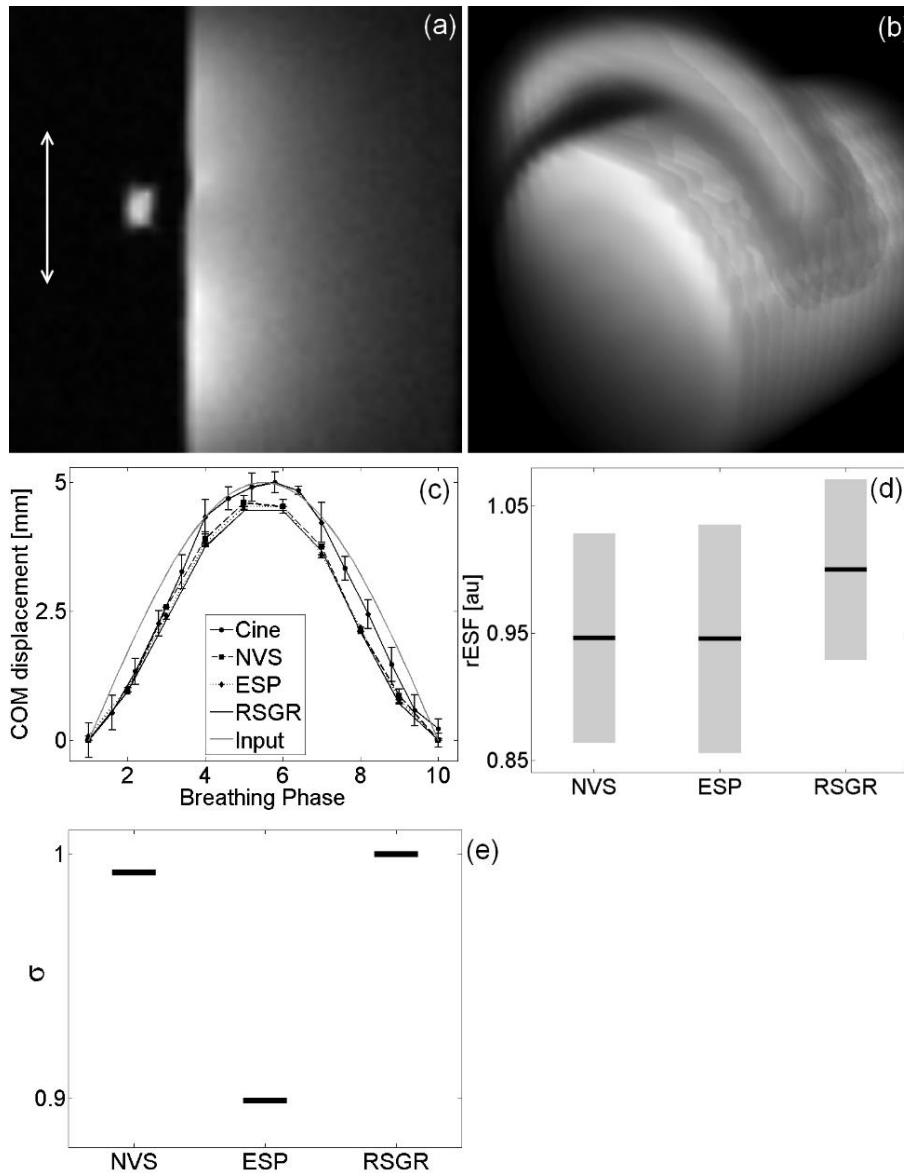

87

88 **Supplementary Figure S7.** Image quality as a function of reconstruction method in a dynamic phantom. (a) Sagittal  
 89 slice at center of phantom (arrow demonstrates direction of motion) and (b) surface rendering of phantom image at  
 90 respiratory phase 1. (c) Displacement of phantom center-of-mass as a function of breathing phase. (d) Mean rESF  
 91 (across breathing phases) over moving phantom as a function of reconstruction technique. In regions with large  
 92 temporal changes RSGR-PEVS provides a significant improvement in spatial resolutions while ESP-PEVS does not  
 93 improve resolution. Bar-plots depict average  $\pm$  standard error of mean. (e) Effect of reconstruction technique on  
 94 noise. The noise floor ( $\sigma$ ) is estimated by the standard deviation of signal intensity (across phases) in a large  
 95 background region with no NMR signal.

96

97 of the center-of-mass with comparable accuracy. Spatial resolution improvements in features

98 with large temporal changes were assessed by calculating rESF in the moving phantom. rESF

### **View-sharing for respiratory motion imaging**

99 was estimated as the mean image gradient in an ROI enclosing the moving phantom. Mean rESF  
100 was significantly higher in images reconstructed with RSGR-PEVS; no significant difference  
101 was observed in images reconstructed with ESP-PEVS and NVS-PEVS, as shown in Fig. S7(d).  
102 This finding confirms the hypothesis that the average breathing signal is a measure of spatial  
103 changes across respiratory phases and can accordingly adapt the amount of data sharing to  
104 minimize spatiotemporal blurring. Similar to results observed in the XCAT phantom, further  
105 examination of the rESF shows that spatial resolution also varies across breathing phases, as  
106 shown in Fig. S8 below. The circularity and solidity of the moving phantom were not  
107 significantly different in images reconstructed with any of the 4D-PEVS methods. Finally, a  
108 comparison of the noise floor reveals that while ESP-PEVS improves SNR, RSGR-PEVS has a  
109 negligible effect on SNR, as shown in Fig. S7(e).

110

111

View-sharing for respiratory motion imaging

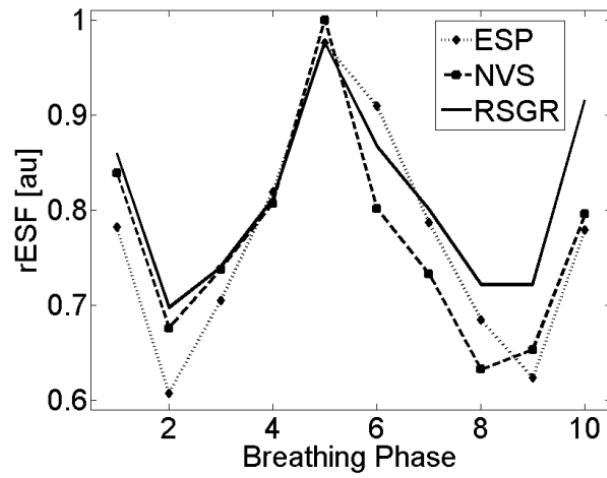

112

113 **Supplementary Figure S8.** rESF in dynamic phantom as a function of breathing phase for the three reconstruction  
114 techniques described in manuscript. Improvements in spatial resolution are respiratory phase dependent.

115

116

117

118

119

120

121

122

123

124

125

126

127

128

129

130

131

132

133 **Supplementary Materials S3. Imaging parameters for human volunteer experiments**

134 *Study 1*

135 The method was tested in a 3.0T clinical scanner (Verio, Siemens AG, Erlangen,  
136 Germany). An actively detuned volume RF-coil was used in conjunction with a 12-channel coil  
137 for surface receive. The stack-of-stars sampling function was used with the following acquisition  
138 parameters: FOV = 38.4 x 38.4 x 25.6 cm<sup>3</sup>, matrix size = 256 x 256, 64 stacks in the k<sub>z</sub>-direction  
139 (superior-inferior), 650 spokes/stack, TR/TE = 4.06/1.68 ms, BW = 618 Hz/pixel, NEX = 1,  $\alpha$  =  
140 12°, and total scan time ~ 2.5 mins. This scan was added to the end of a clinical exam that used  
141 10 ml of Gd-DTPA (Magnevist, Bayer Healthcare, Leverkusen, Germany) followed by a 20-ml  
142 saline flush, both injected at a rate of 2 ml/second. The respiratory signal was extracted from  
143 projections along the z-direction using principal component analysis, as previously described [1,  
144 2]. The respiratory cycle was retrospectively sorted into ten equal phases based on the phase  
145 angle of the breathing signal.

146 *Study 2*

147 The method was tested in a 1.5T clinical scanner (GE Healthcare, Waukesha, WI). An  
148 actively detuned receive chest coil (Clinical MR Solutions, Brookfield, WI) was used in  
149 conjunction with the body coil for excitation. The multidimensional golden-means sampling  
150 function was used with the following acquisition parameters: FOV = 40 cm<sup>3</sup>, matrix size = 128<sup>3</sup>,  
151 TR/TE = 5.0/0.264 ms, BW = 31.25 kHz, NEX = 1,  $\alpha$  = 10°, 25000 spokes, and total scan time =  
152 2.1 mins. Breathing motion was monitored with a respiratory bellows belt and compared to the  
153 respiratory signal extracted from the DC-component in k-space. The respiratory cycle was  
154 retrospectively sorted into ten equal phases based on the phase angle of the breathing signal  
155 derived from k-0.

156 Figure S9 displays a montage of respiratory phase 1, 4, and 8 reconstructed with and  
157 without view-sharing. The improvements in spatial resolution can be appreciated at the interface  
158 of low-high contrast regions and small features, such as the hepatic vessels. The mean rESF  
159 across breathing phases reveals that the degree of blurring in moving edges reconstructed with

## View-sharing for respiratory motion imaging

160 RSGR-PEVS is comparable to that found in images reconstructed without view-sharing, as seen  
161 in panel S10(a). This finding confirms the hypothesis that the average breathing signal is a

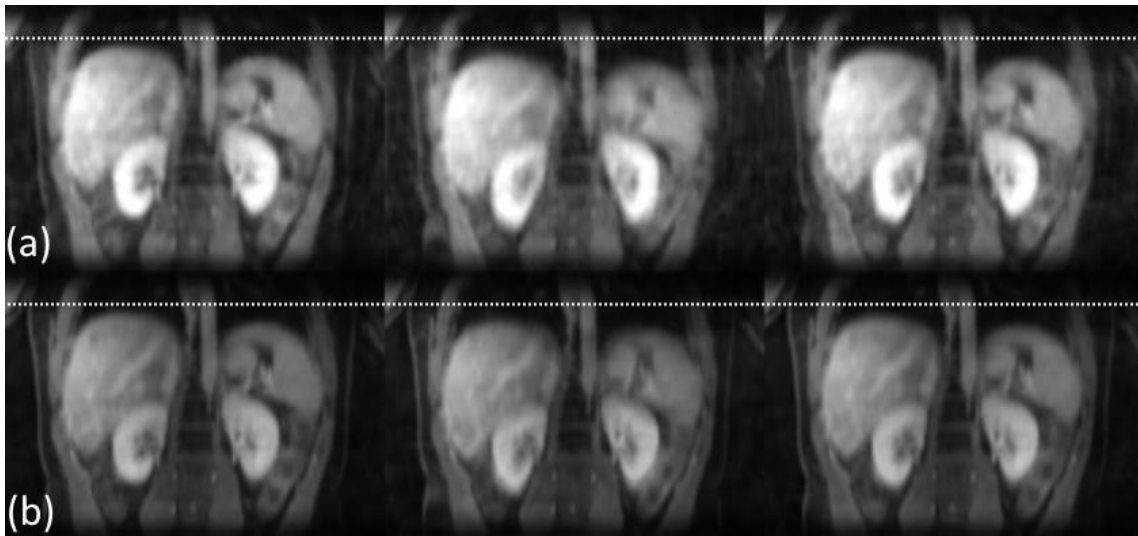

162  
163 **Supplementary Figure S9.** Validation in human volunteer at 3.0T. From left to right, phases 1, 4, and 8 from  
164 reconstruction (a) without and (b) with view-sharing. The images are normalized by maximum value of  
165 reconstructed intensity and displayed using equal window/level settings. Improvements in spatial resolution can be  
166 seen at the lung-liver interface and hepatic vessels.

167 measure of spatial changes across respiratory phases and can accordingly adapt the amount of  
168 data sharing to minimize spatiotemporal blurring. A comparison of the noise floor in images  
169 reconstructed with each method reveals that RSGR-PEVS does not degrade SNR, as seen in  
170 panel S10(b). Figure S11 shows the respiratory signal determined from principal component  
171 analysis of projections in the z-direction.

172 We include three movies from the volunteer in Study 1 above. The movies display the  
173 reconstructions with NVS, ESP, and RSGR (from left to right) in the three cardinal planes.

174

## View-sharing for respiratory motion imaging

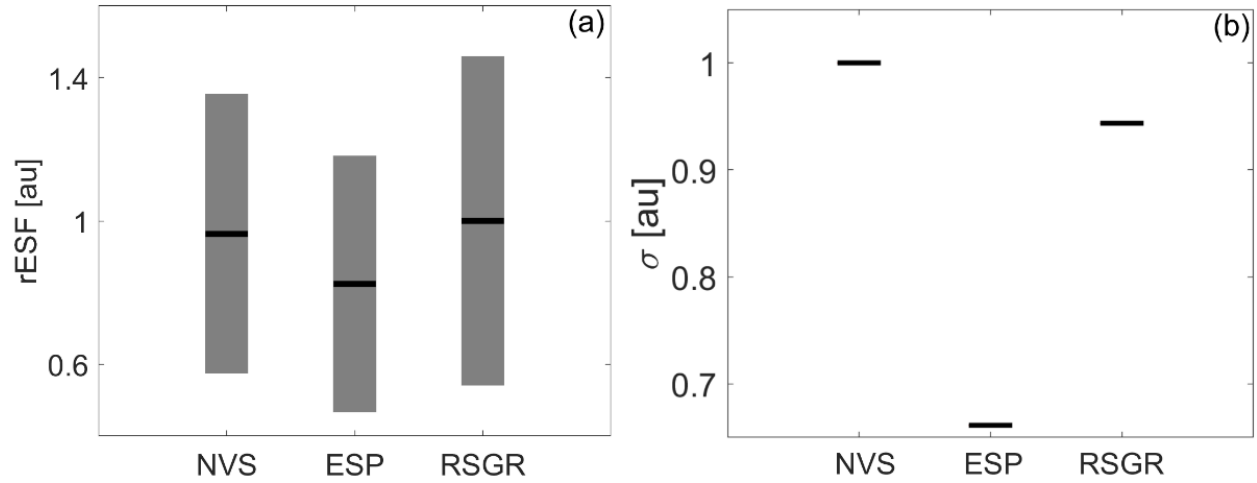

175

176 **Supplementary Figure S10.** (a) Comparison of mean and standard error of rESF calculated at the lung-liver  
177 interface in human volunteer scanned at 1.5T using the multidimensional golden means trajectory. The mean and  
178 standard error were calculated over ten breathing phases. (b) Effect of reconstruction technique on noise. The noise  
179 floor ( $\sigma$ ) is estimated by the standard deviation of signal intensity (across phases) in a large background region with  
180 no NMR signal.

181

182

View-sharing for respiratory motion imaging

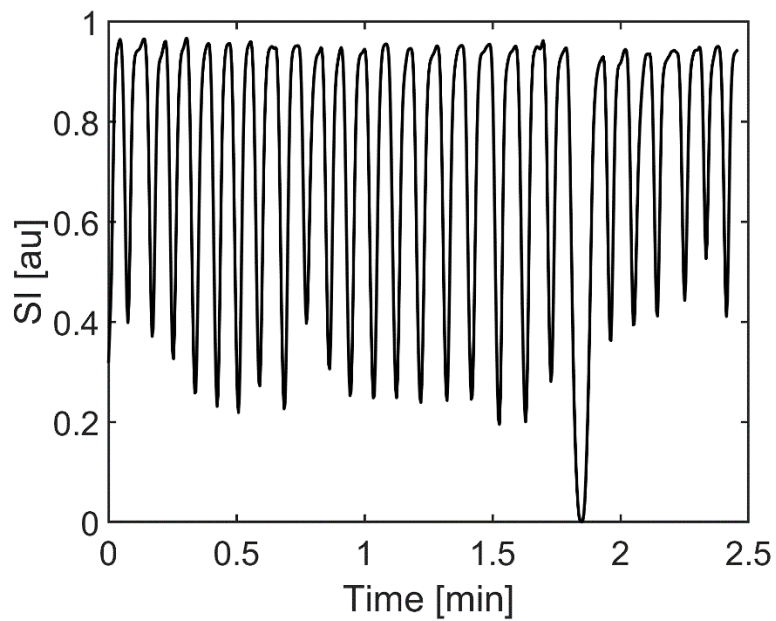

183

184 **Supplementary Figure S11.** Respiratory signal from volunteer in Study 1 described above. Signal determined from  
185 principal component analysis of projections in the z-direction.

186

## View-sharing for respiratory motion imaging

187 Figure S12 displays a montage of respiratory phases 1, 4, and 8 reconstructed with and  
188 without view-sharing. The improvements in spatial resolution can be appreciated at the interface  
189 of low-high contrast regions and small features such as the pulmonary vessels. The mean rESF  
190 across breathing phases reveals that the degree of blurring in moving edges reconstructed with  
191 RSGR-PEVS is comparable to that found in images reconstructed without view-sharing, as seen  
192 in panel S13(a). This finding confirms the hypothesis that the average breathing signal is a

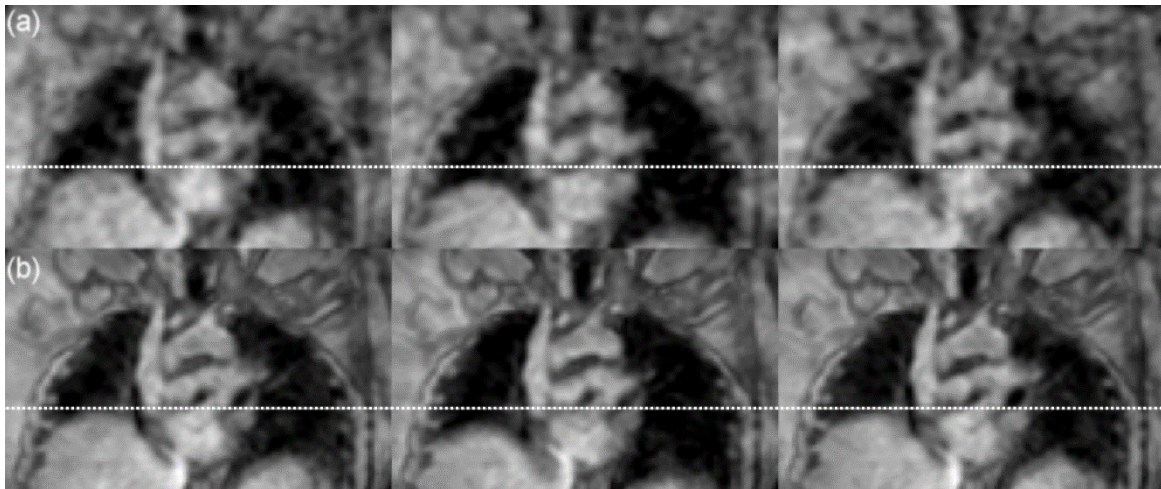

193  
194 **Supplementary Figure S12.** Validation in human volunteer at 1.5T. From left to right, phases 1, 4, and 8 from  
195 reconstruction (a) without and (b) with view-sharing. Improvements in spatial resolution can be appreciated at the  
196 lung-liver interface and pulmonary vessels. Note that total acquisition time is 2.1 mins.

197 measure of spatial changes across respiratory phases and can accordingly adapt the amount of  
198 data sharing to minimize spatiotemporal blurring. A comparison of the noise floor in images  
199 reconstructed with each method reveals that RSGR-PEVS does not degrade SNR, as shown in  
200 panel S13(b). Figure S14 shows the respiratory signal determined from the center of k-space.



## View-sharing for respiratory motion imaging

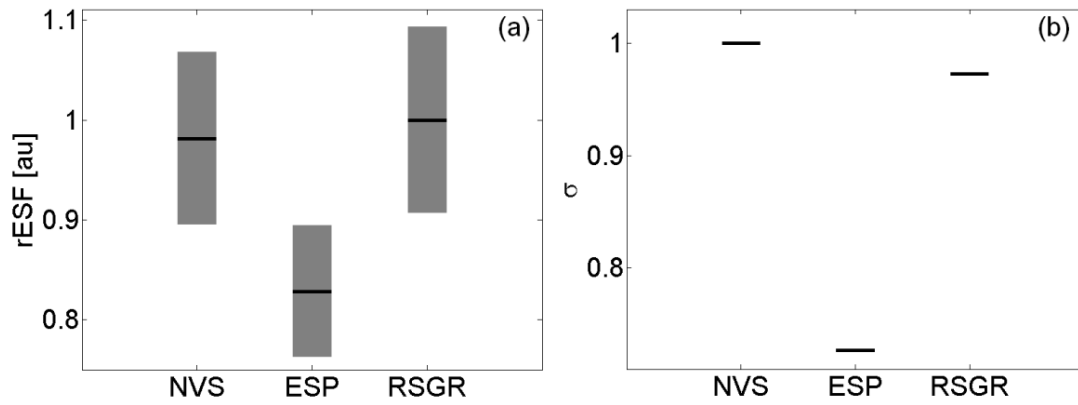

201

202 **Supplementary Figure S13.** (a) Comparison of mean and standard error of rESF calculated at the lung-liver  
203 interface in human volunteer. The mean and standard error were calculated over ten breathing phases. (b) Effect of  
204 reconstruction technique on noise. The noise floor ( $\sigma$ ) is estimated by the standard deviation of signal intensity  
205 (across phases) in a large background region with no NMR signal. Note that total acquisition time is 2.1 mins.

206

207

208

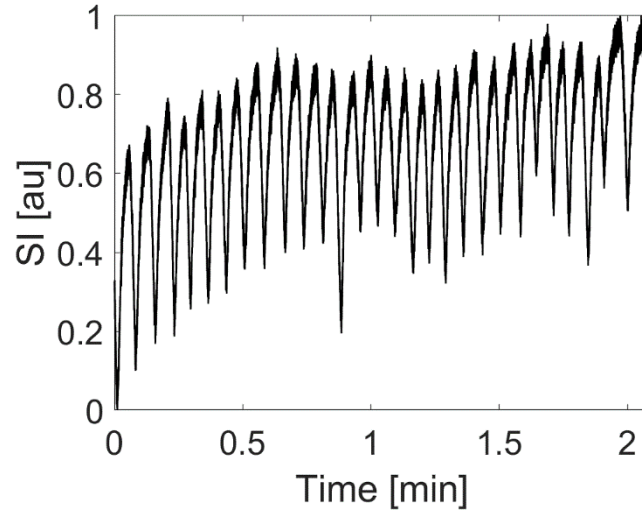

209

210 **Supplementary Figure S14.** Respiratory signal from volunteer in Study 2 described above. Respiratory signal  
211 determined from the center of k-space.

212

213

214

215

216 **REFERENCES**

- 217 [1] Feng L, Axel L, Chandarana H, Block KT, Sodickson DK, Otazo R. XD-GRASP: Golden-angle radial MRI  
218 with reconstruction of extra motion-state dimensions using compressed sensing. *Magn Reson Med.*  
219 2016;75:775-88.
- 220 [2] Feng L, Huang C, Shanbhogue K, Sodickson DK, Chandarana H, Otazo R. RACER-GRASP: Respiratory-  
221 weighted, aortic contrast enhancement-guided and coil-unstreaking golden-angle radial sparse MRI.  
222 *Magn Reson Med.* 2018;80:77-89.

223
